# Supplementary material for: All-solid-state Li-metal batteries: role of blending PTFE with PEO and LiTFSI salt as a composite electrolyte with enhanced thermal stability
Source: Royal Society of Chemistry journal article supplement (doi:10.1039/d0se00013b), 2020-01-01
Supplement: d0se00013b1.pdf [file d0se00013b1.pdf]

## Supporting Information

# All-Solid-State Li-metal Batteries: Role of Blending PTFE in PEO with LiTFSI Salt as Composite Electrolyte with Enhanced Thermal Stability

*Deep A. Jokhakar, Dhanya Puthusseri, Palanisamy Manikandan, Zheng Li, Jooho Moon, Hsin-Jan Weng, Vilas G. Pol\**

Davidson School of Chemical Engineering, Purdue University, 480 Stadium Mall Drive, West Lafayette, IN 47907, United States

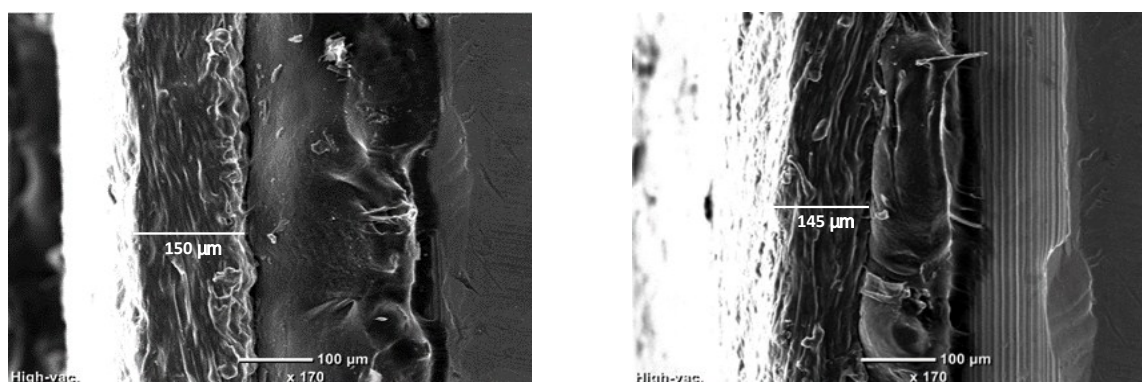

**PEO<sub>100</sub>**

**PTFE<sub>10</sub>PEO<sub>90</sub>**

**Figure S1: Cross-sectional images of the electrolyte films.**

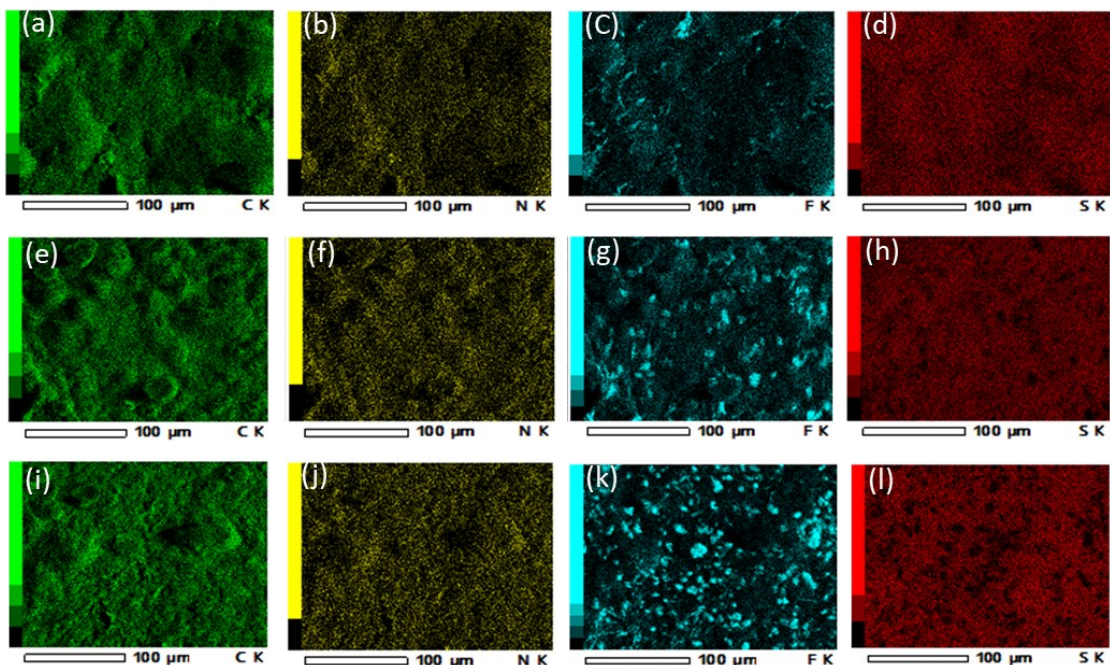

**Figure S2** Maps of the distribution of elements C, N, F and S in various electrolytes obtained from energy dispersive X-ray (EDX) analysis. EDS of (a, b, c and d) PEO<sub>100</sub>, (e, f, g, and h) PTFE<sub>20</sub> PEO<sub>80</sub>, and (i, j, k, and l) PTFE<sub>30</sub> PEO<sub>70</sub>.

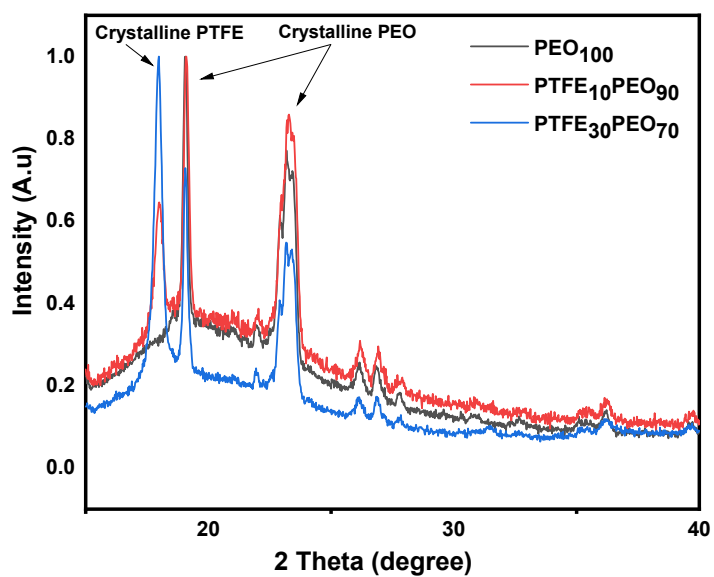

**Figure S3** Powder X-ray diffraction of PEO<sub>100</sub>, PTFE<sub>20</sub> PEO<sub>80</sub>, and PTFE<sub>30</sub> PEO<sub>70</sub>.

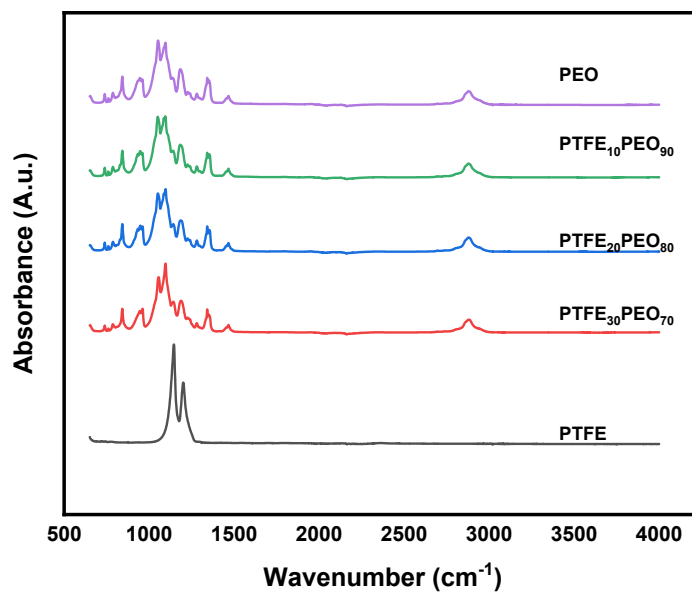

**Figure S4** FTIR spectra of the solid electrolytes with different composition of PEO and PTFE

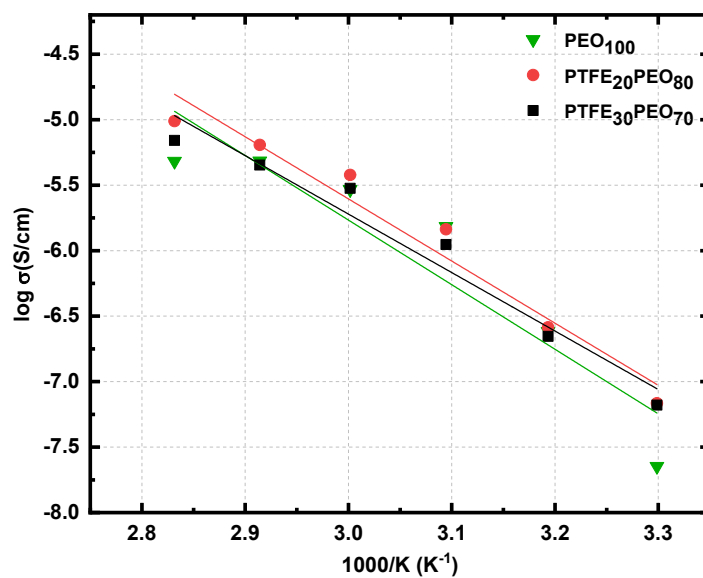

**Figure S5** Arrhenius plots for PEO, PTFE<sub>20</sub>PEO<sub>80</sub>, PTFE<sub>30</sub>PEO<sub>70</sub> composite polymer electrolyte

| Material                             | Slope (K) | $E_a$ (J/mol) |
|--------------------------------------|-----------|---------------|
| PEO <sub>100</sub>                   | -4.9314   | 40.9996596    |
| PTFE <sub>20</sub> PEO <sub>80</sub> | -4.7447   | 39.4474358    |
| PTFE <sub>30</sub> PEO <sub>70</sub> | -4.4621   | 37.0978994    |

**Table S1** Activation energy calculations for PEO<sub>100</sub>, PTFE<sub>20</sub>PEO<sub>80</sub>, and PTFE<sub>30</sub>PEO<sub>70</sub> composite polymer electrolyte.

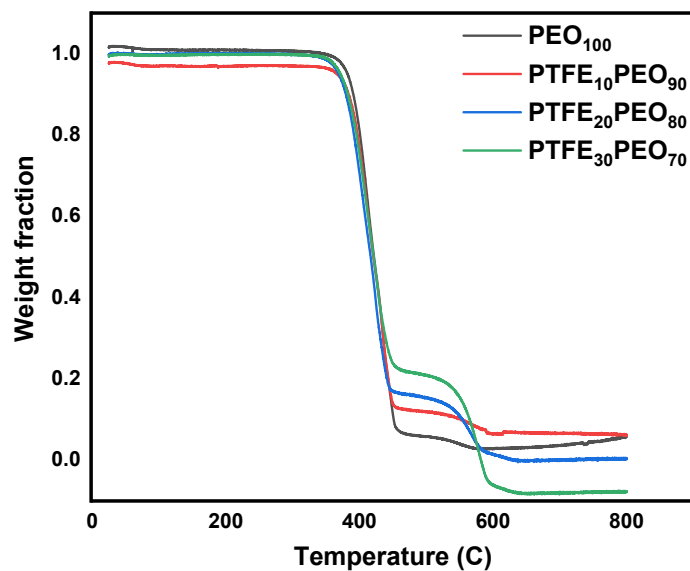

**Figure S6** Thermogravimetric data obtained for PEO and PEO-PTFE composite electrolytes

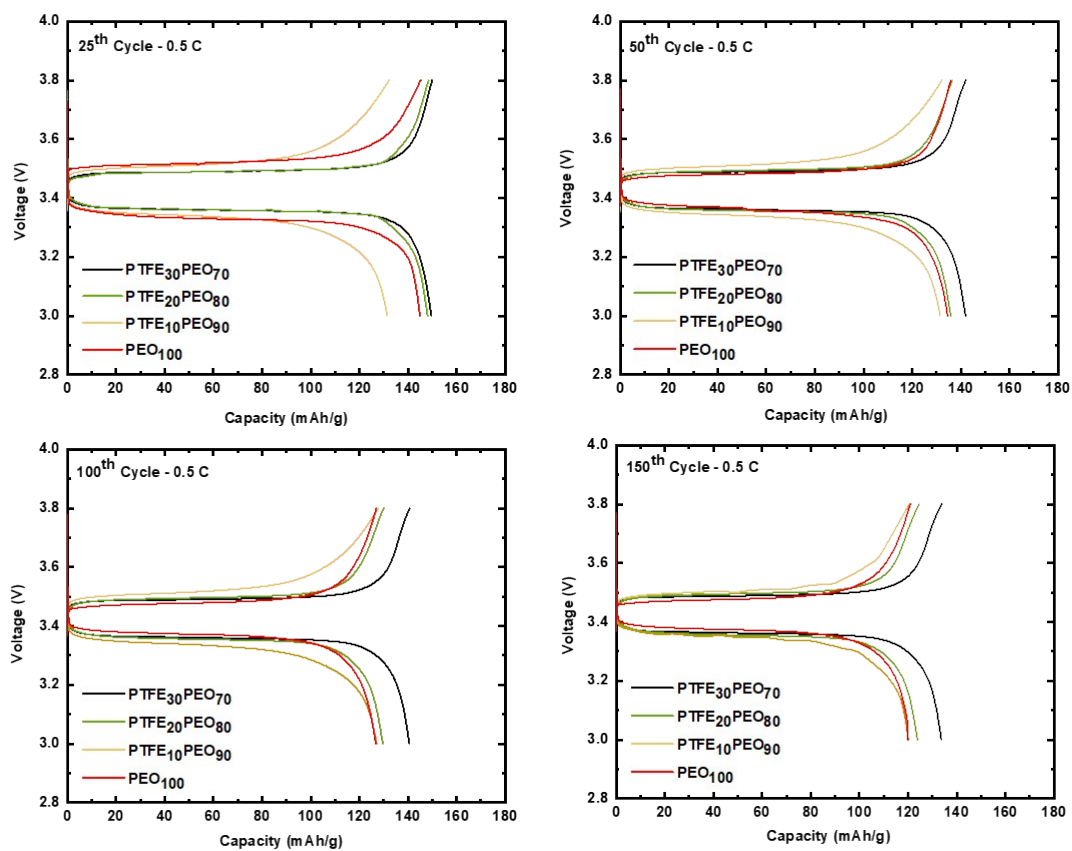

**Figure S7** Voltage profile for the cycles (a) 25, (b) 50, (c) 100 and (d) 150 for all the composite electrolytes

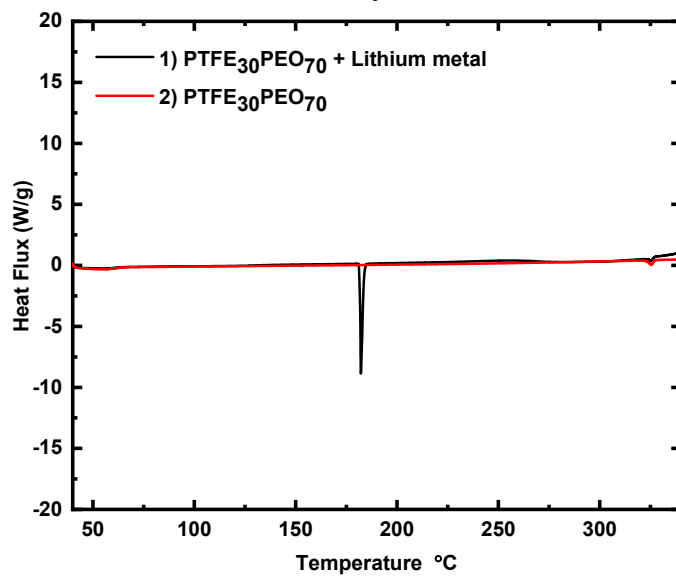

**Figure S8** DSC response for PTFE<sub>30</sub> PEO<sub>70</sub> and PTFE<sub>30</sub> PEO<sub>70</sub> with Li metal
